# Supplementary material
Source: HighWire-hosted journal article supplement (https://genome.cshlp.org/content/suppl/2004/03/09/14.4.555)
Supplement: Taylor-19778_supp_4.pdf [file Taylor-19778_supp_4.pdf]

Supplemental Figure SF1

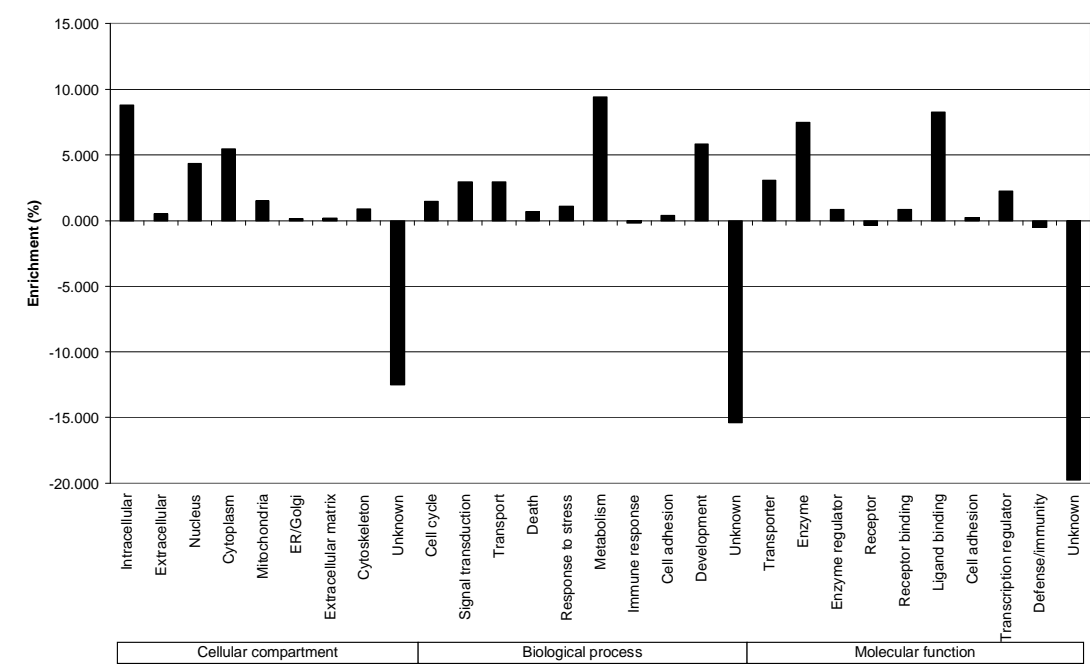

**Supplemental Figure SF1.** Fraction of Gene Ontology (GO) terms compared between all human genes and the subset of human genes with identified 1:1:1 orthologues in mouse and rat. Positive enrichment indicates over-representation in the 1:1:1 ortholog set and negative enrichment under-representation in this set. GO terms were extracted from Ensembl(<http://www.ensembl.org/>). Only the annotation of human genes was considered, the human annotation being applied to each ortholog set.
